# Supplementary material
Source: PubMed Central journal article supplement (PMC5528765)

Figure S1

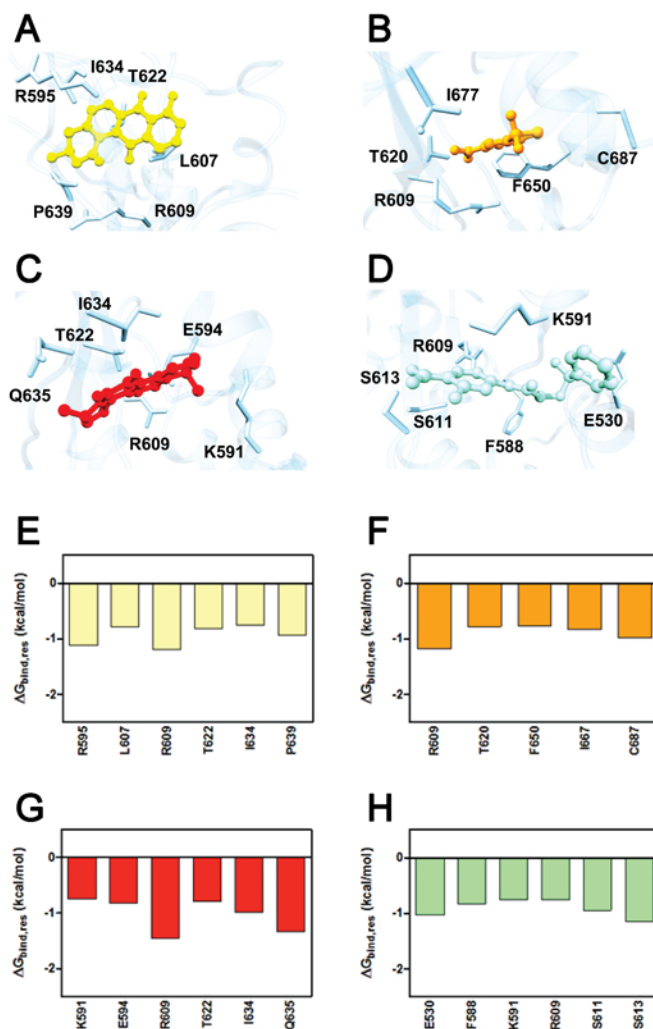

Supplement: MOL2-9-1194-s001.pdf [file MOL2-9-1194-s001.pdf]

Figure S2

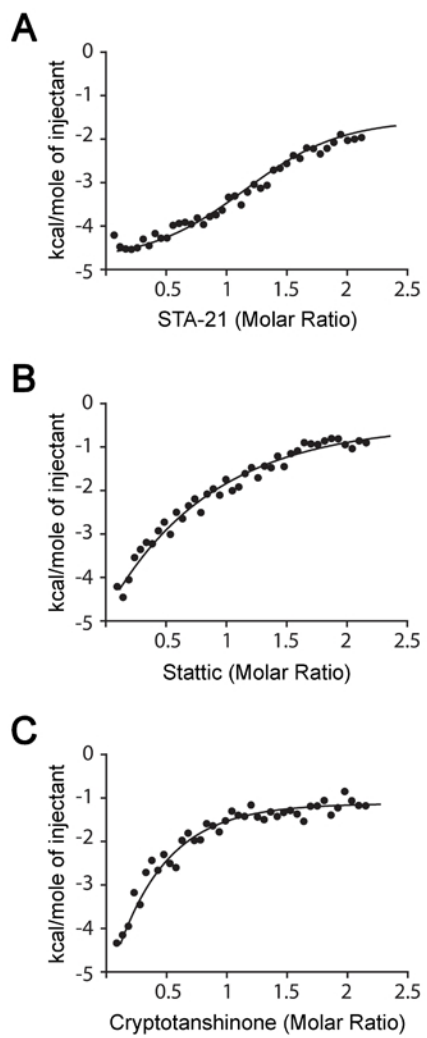

Supplement: MOL2-9-1194-s002.pdf [file MOL2-9-1194-s002.pdf]

Figure S3

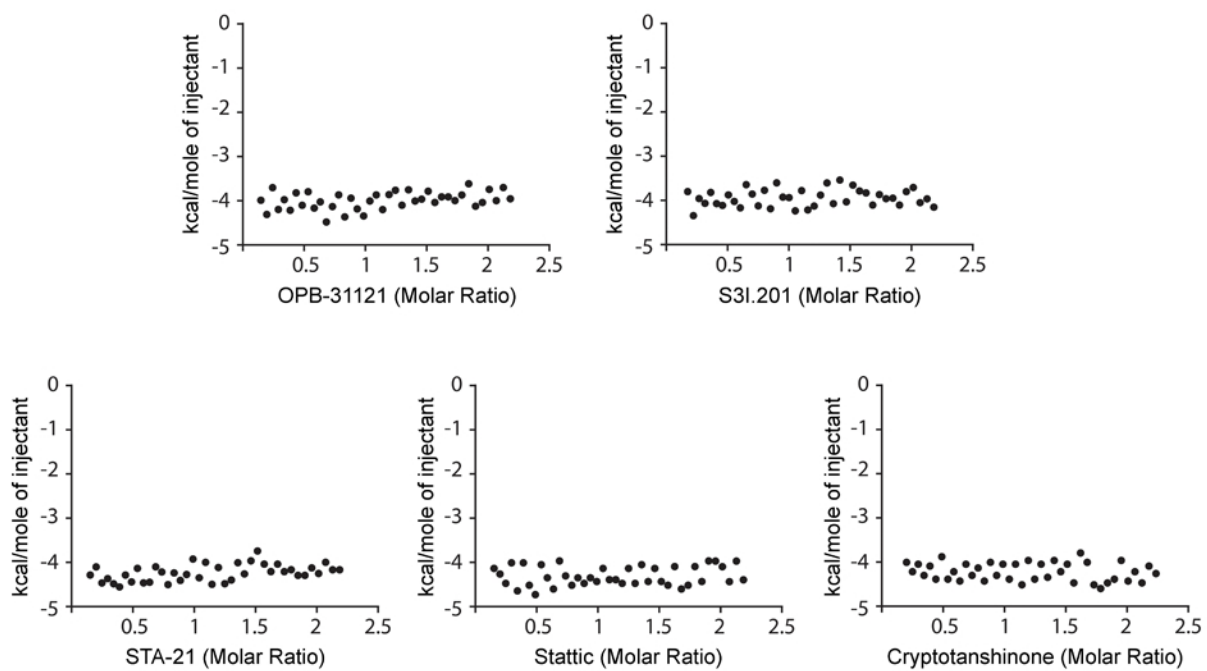

Supplement: MOL2-9-1194-s003.pdf [file MOL2-9-1194-s003.pdf]

Figure S4

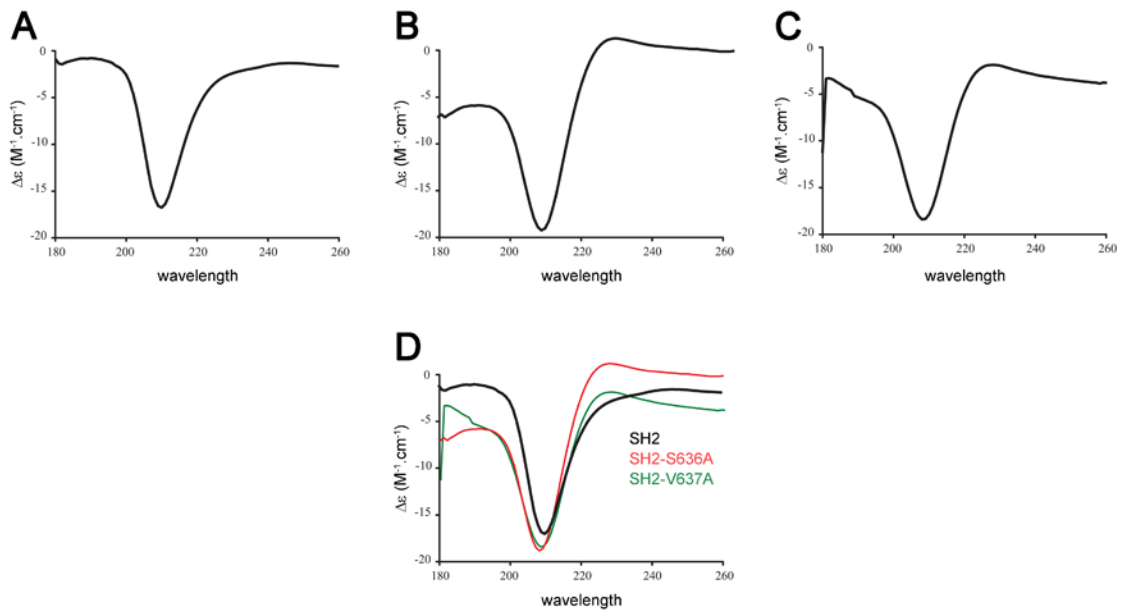

Supplement: MOL2-9-1194-s004.pdf [file MOL2-9-1194-s004.pdf]
